# Supplementary material
Source: PubMed Central journal article supplement (PMC10911234)
Supplement: NIHMS1967242-supplement-supplemental_figure.pdf [file NIHMS1967242-supplement-supplemental_figure.pdf]

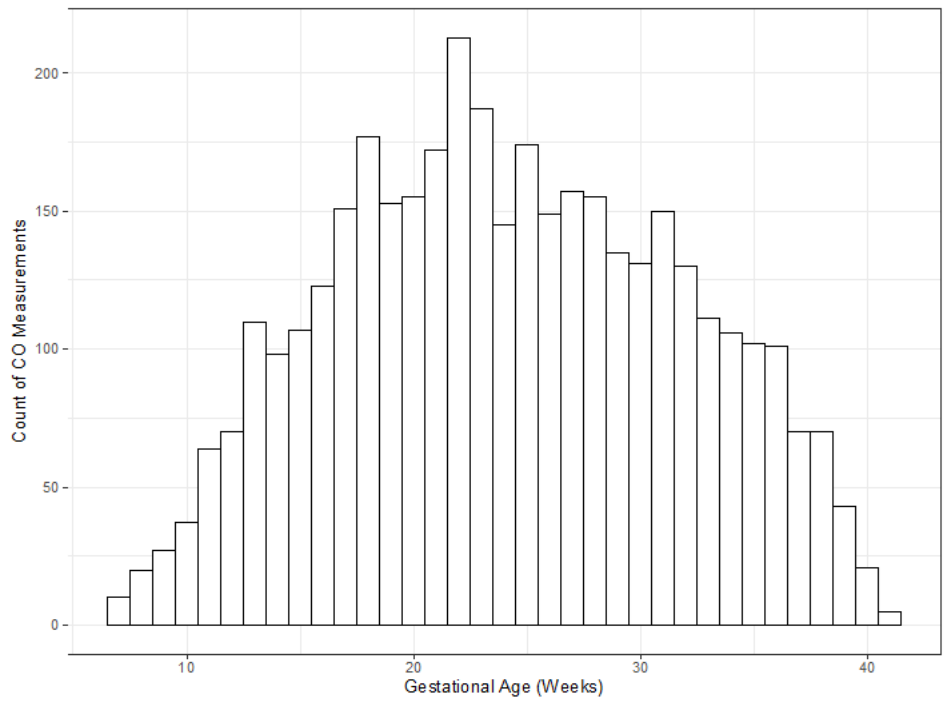

Supplemental Figure 1. Histogram of the count of carbon monoxide (CO) measurements available at each week gestation.
